Figure 1G

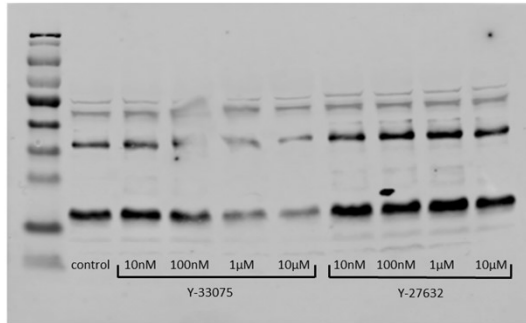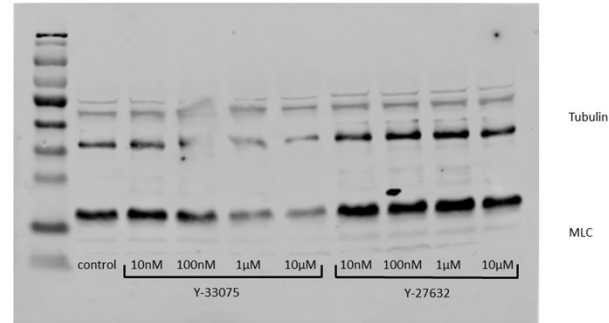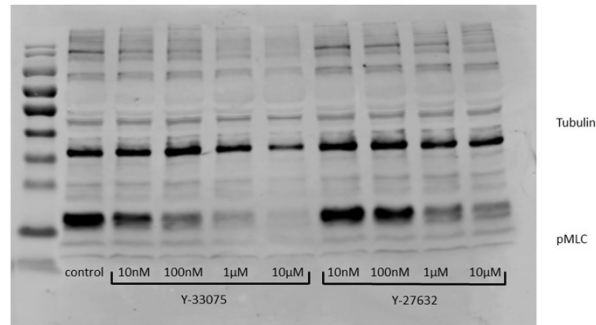

Figure 2A

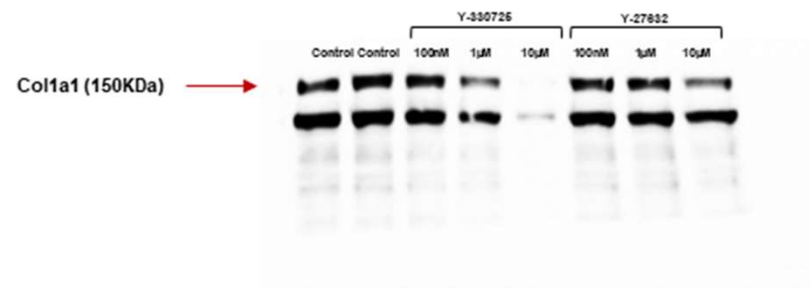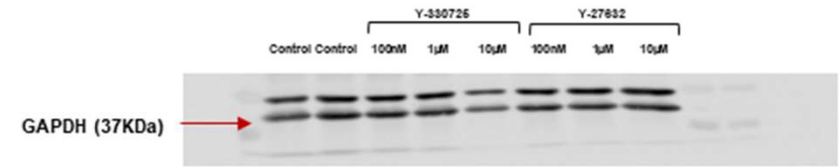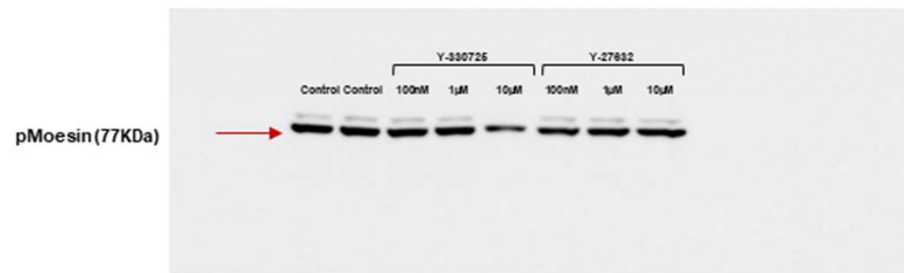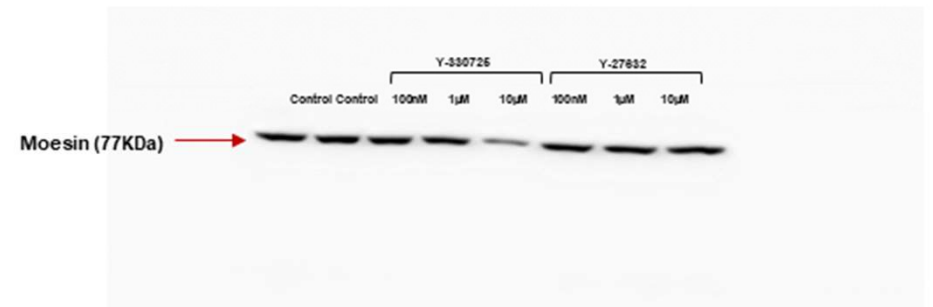



Figure 4E

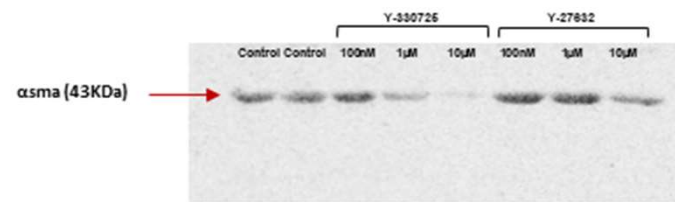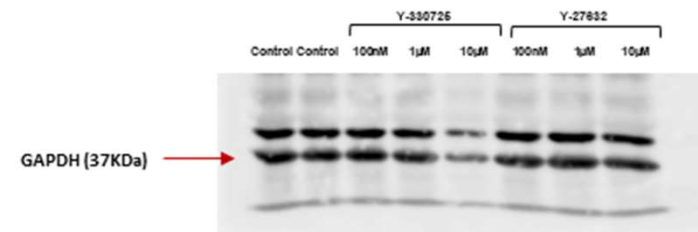

Figure 4G

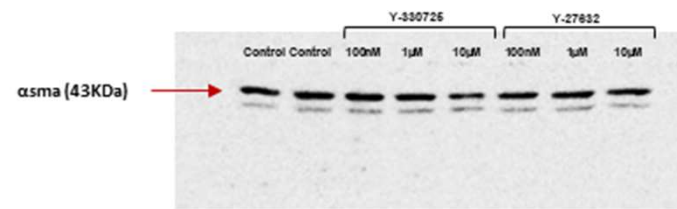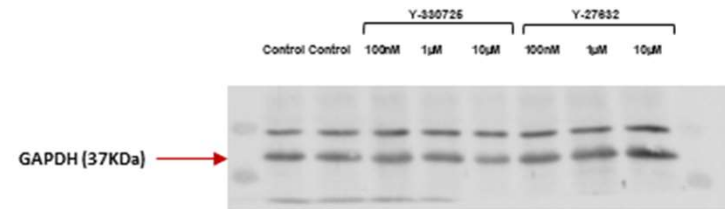

Source: https://storage.googleapis.com/plos-corpus-prod/10.1371/journal.pone.0270288/1/pone.0270288.s001.pdf
